# Supplementary material
Source: PubMed Central journal article supplement (PMC8171433)
Supplement: NIHMS1691583-supplement-Supplementary_Materials_-_Fidelity_Checklist.pdf [file NIHMS1691583-supplement-Supplementary_Materials_-_Fidelity_Checklist.pdf]

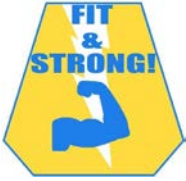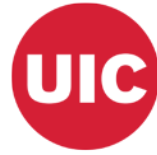

**Fit & Strong! Fidelity Checklist**

Site Name: \_\_\_\_\_ City: \_\_\_\_\_

State: \_\_\_\_\_ Date: \_\_\_\_\_

Instructor: \_\_\_\_\_

Reviewer: \_\_\_\_\_

Week #: \_\_\_\_\_ Session #: \_\_\_\_\_

Taken attendance regularly? Yes\_\_\_ No\_\_\_

# of Participants at program start: \_\_\_\_\_

# of Drop Outs: \_\_\_\_\_

# of Classes Instructor Missed (Unintentional, Unplanned): \_\_\_\_\_

# of Classes Cancelled: \_\_\_\_\_

Made Up? \_\_\_\_\_

Any Complaints/ Issues?:

Attendance Day of Visit: \_\_\_\_\_

# of women: \_\_\_\_\_

# of men: \_\_\_\_\_

## A. Program Components

### 1. Warm-Up

Did warm-up? Yes\_\_\_ No\_\_\_

Start Time\_\_\_\_\_ End Time\_\_\_\_\_ Total time:\_\_\_\_\_

### Flexibility/ Stretching

#### Upper Body

| Type of exercise<br>Check if Yes | Describe adaptations |
|----------------------------------|----------------------|
| Shoulder rolls_____              |                      |
| Side to side_____                |                      |
| Single arm diagonal_____         |                      |
| Double arm diagonal_____         |                      |
| Drawing a sword_____             |                      |
| Shoulder stretch_____            |                      |
| Triceps stretch_____             |                      |
| Sunburst_____                    |                      |
| Trunk side bends_____            |                      |
| Shoulder shrugs_____             |                      |
| Head tilts_____                  |                      |
| Pat on back_____                 |                      |

New Upper Body Warm-Up Exercises      Yes\_\_\_      No\_\_\_

Describe:

Usefulness/ Appropriateness of new Upper Body Warm-Up Exercises:

1                      2                      3                      4                      5  
 Not at all      Somewhat      Moderately      Highly      Extremely

**Lower Body**

| Type of exercise<br>Check if Yes | Describe adaptation |
|----------------------------------|---------------------|
| Heel lifts_____                  |                     |
| Ankle pump_____                  |                     |
| Toe raises_____                  |                     |
| Ankle circles_____               |                     |
| Roll back and forth_____         |                     |
| Trunk and leg stretch_____       |                     |
| Calf stretch_____                |                     |
| Quadriceps stretch_____          |                     |
| Lunges_____                      |                     |

New Lower Body Warm-Up Exercises      Yes \_\_\_      No \_\_\_

Describe:

Usefulness/ Appropriateness of new Lower Body Warm-Up Exercises:

|            |          |            |        |           |
|------------|----------|------------|--------|-----------|
| 1          | 2        | 3          | 4      | 5         |
| Not at all | Somewhat | Moderately | Highly | Extremely |

Music?      Yes \_\_\_      No \_\_\_

If Yes, describe:

**Comments for Warm-Up:**

## 2. Aerobic Conditioning

Start Time \_\_\_\_\_ End Time \_\_\_\_\_ Total time: \_\_\_\_\_

| Type of exercise<br>Check if Yes              | Describe adaptations |
|-----------------------------------------------|----------------------|
| Walking_____                                  |                      |
| Marching_____                                 |                      |
| Side to side heel or toe or stepping_____     |                      |
| Forward and back heel or toe or stepping_____ |                      |
| In and out heel or toe or stepping_____       |                      |
| V step_____                                   |                      |
| Arm punching with lunging                     |                      |
| Forward kicks_____                            |                      |
| Knee lifts_____                               |                      |
| Grape vine_____                               |                      |
| Knee bent kick back_____                      |                      |
| Dancing_____                                  |                      |

New Aerobic Exercises      Yes\_\_\_      No\_\_\_

Describe:

Usefulness/ Appropriateness of new Aerobic Exercises:

|            |          |            |        |           |
|------------|----------|------------|--------|-----------|
| 1          | 2        | 3          | 4      | 5         |
| Not at all | Somewhat | Moderately | Highly | Extremely |

Music?      Yes\_\_\_      No\_\_\_

If Yes, describe:

**Comments for Aerobics:**

**3. Strength Training**

Start Time \_\_\_\_\_ End Time \_\_\_\_\_ Total time: \_\_\_\_\_

**Lower Body:** Yes \_\_\_ No \_\_\_ **Lower Body equipment:** weights \_\_\_ bands \_\_\_

| Type of exercise<br>Check if Yes       | Reps | Sets | Describe adaptations |
|----------------------------------------|------|------|----------------------|
| Back leg lift _____                    |      |      |                      |
| Side leg lift _____                    |      |      |                      |
| Mini squats _____                      |      |      |                      |
| Knee extension _____                   |      |      |                      |
| Knee lift _____                        |      |      |                      |
| Hamstring curl _____                   |      |      |                      |
| Seated knee extension isometrics _____ |      |      |                      |
| Hip abduction _____                    |      |      |                      |

New Lower Extremity Strength Exercises: Yes \_\_\_ No \_\_\_

Describe:

Usefulness/ Appropriateness of new Lower Extremity Strength Exercises:

1                      2                      3                      4                      5  
 Not at all          Somewhat          Moderately          Highly              Extremely

Upper Body: Yes\_\_\_ No\_\_\_ Upper Body equipment: weights\_\_\_bands\_\_\_

| Type of exercise<br>Check if Yes        | Reps | Sets | Describe adaptation |
|-----------------------------------------|------|------|---------------------|
| Single arm fly<br>(bow and<br>arrow)___ |      |      |                     |
| Single arm<br>overhead<br>press___      |      |      |                     |
| Back pull___                            |      |      |                     |
| Diagonal arm<br>pull___                 |      |      |                     |
| Bicep curl___                           |      |      |                     |

New Upper Extremity Strength Exercises: Yes\_\_\_ No\_\_\_

Describe:

Usefulness/ Appropriateness of new Upper Extremity Strength Exercises:

1                    2                    3                    4                    5  
 Not at all        Somewhat        Moderately        Highly            Extremely

**Comments for Strength Training:**



**4. Balance Exercises**

Incorporated Balance Exercises? Yes \_\_\_ No \_\_\_

Start Time \_\_\_\_\_ End Time \_\_\_\_\_ Total time: \_\_\_\_\_

| Type of exercise<br>Check if Yes            | Describe adaptations |
|---------------------------------------------|----------------------|
| Rocking back on forth on heel to toes _____ |                      |
| Forward leg lift _____                      |                      |
| Back leg lift _____                         |                      |
| Side leg lift _____                         |                      |
| Shift weight from side to side _____        |                      |
| Reach up, forward, and down _____           |                      |
| Walking a straight line _____               |                      |
| Walk heel to toe _____                      |                      |
| Knee bend (foot lifts behind) _____         |                      |
| Stand on toes and hold _____                |                      |
| Stand on heels and hold _____               |                      |
| Knee lift toward chest _____                |                      |
| Stand on one foot                           |                      |
| Stand up and sit down _____                 |                      |

Used Adaptations for Balance/ Support: Use one hand, fingertips only, 1 finger, 1 fingertip, no hands eyes closed

New Balance Exercises: Yes\_\_\_\_\_ No\_\_\_\_\_

Describe:

Usefulness/ Appropriateness of new Balance Exercises:

|            |          |            |        |           |
|------------|----------|------------|--------|-----------|
| 1          | 2        | 3          | 4      | 5         |
| Not at all | Somewhat | Moderately | Highly | Extremely |

Music? Yes\_\_\_\_\_ No\_\_\_\_\_

If Yes, describe:

**Comments for Balance:**

**5. Floor Exercises**

Start Time \_\_\_\_\_

End Time \_\_\_\_\_

Total time: \_\_\_\_\_

| Type of exercise<br>Check if Yes | Describe adaptations |
|----------------------------------|----------------------|
| Hip Stretch _____                |                      |
| Hamstring stretch _____          |                      |
| Trunk stretch _____              |                      |
| Hip roll _____                   |                      |
| Bridging _____                   |                      |
| Shoulder blade pull _____        |                      |
| Quadriceps stretch _____         |                      |
| Modified sit up _____            |                      |
| Double hip rotation _____        |                      |

New Floor Exercises:      Yes \_\_\_      No \_\_\_

Describe:

Usefulness/ Appropriateness of new Floor Exercises:

1                      2                      3                      4                      5  
 Not at all      Somewhat      Moderately      Highly      Extremely

**Comments for Floor Exercises:**

## 6. Cool-Down/Flexibility

Start Time \_\_\_\_\_

End Time \_\_\_\_\_

Total time: \_\_\_\_\_

### Upper Body

| Type of exercise<br>Check if Yes | Describe adaptations |
|----------------------------------|----------------------|
| Shoulder rolls _____             |                      |
| Side to side _____               |                      |
| Single arm diagonal _____        |                      |
| Double arm diagonal _____        |                      |
| Drawing a sword _____            |                      |
| Shoulder stretch _____           |                      |
| Triceps stretch _____            |                      |
| Sunburst _____                   |                      |
| Trunk side bends _____           |                      |
| Shoulder shrugs _____            |                      |
| Head tilts _____                 |                      |
| Pat on back _____                |                      |

New Upper Body Cool-Down Exercises: Yes\_\_\_ No\_\_\_

Describe:

Usefulness/ Appropriateness of new Upper Body Cool-Down Exercises:

1 Not at all      2 Somewhat      3 Moderately      4 Highly      5 Extremely

**Lower Body**

| Type of exercise<br>Check if Yes | Describe adaptation |
|----------------------------------|---------------------|
| Heel lifts_____                  |                     |
| Ankle pump_____                  |                     |
| Toe raises_____                  |                     |
| Ankle circles_____               |                     |
| Roll back and forth_____         |                     |
| Trunk and leg stretch_____       |                     |
| Calf stretch_____                |                     |
| Quadriceps stretch_____          |                     |
| Lunges_____                      |                     |

New Lower Body Cool-Down Exercises: Yes\_\_\_ No\_\_\_

Describe:

Usefulness/ Appropriateness of new Lower Body Cool-Down Exercises:

|            |          |            |        |           |
|------------|----------|------------|--------|-----------|
| 1          | 2        | 3          | 4      | 5         |
| Not at all | Somewhat | Moderately | Highly | Extremely |

Music? Yes\_\_\_ No\_\_\_

If Yes, describe:

**Comments for Cool-Down:**

**Please rate your overall reaction to the exercise component:**

\_\_\_Excellent(1)\_\_\_Good(2) \_\_\_Fair(3) \_\_\_Poor(4)

**8. Health Education/Group Problem Solving**

Start Time \_\_\_\_\_ End Time \_\_\_\_\_ Total time: \_\_\_\_\_

Completed exercise logs? Yes \_\_\_\_\_ No \_\_\_\_\_

Topic/class session: \_\_\_\_\_

Instructor addressed all objectives for the topic.

Yes \_\_\_\_\_ No \_\_\_\_\_

Participants completed/discussed session activities from manual:

Yes \_\_\_\_\_ No \_\_\_\_\_

Level of participant engagement in discussion.

|     |                 |        |                  |      |
|-----|-----------------|--------|------------------|------|
| 1   | 2               | 3      | 4                | 5    |
| Low | Somewhat<br>Low | Medium | Somewhat<br>High | High |

Level of participant contribution to group discussion.

|     |                 |        |                  |      |
|-----|-----------------|--------|------------------|------|
| 1   | 2               | 3      | 4                | 5    |
| Low | Somewhat<br>Low | Medium | Somewhat<br>High | High |

**Instructor**

1. The instructor was enthusiastic and friendly

|                   |       |                               |          |                      |
|-------------------|-------|-------------------------------|----------|----------------------|
| 1                 | 2     | 3                             | 4        | 5                    |
| Strongly<br>Agree | Agree | Neither<br>agree nor disagree | Disagree | Strongly<br>Disagree |

2. Instructor monitors the appropriateness of exercise intensity of for class participants.

|                   |       |                               |          |                      |
|-------------------|-------|-------------------------------|----------|----------------------|
| 1                 | 2     | 3                             | 4        | 5                    |
| Strongly<br>Agree | Agree | Neither<br>agree nor disagree | Disagree | Strongly<br>Disagree |

3. The instructor kept the class moving at a good pace

|                   |       |                               |          |                      |
|-------------------|-------|-------------------------------|----------|----------------------|
| 1                 | 2     | 3                             | 4        | 5                    |
| Strongly<br>Agree | Agree | Neither<br>agree nor disagree | Disagree | Strongly<br>Disagree |

4. Instructor modifies/adapts routines to accommodate varying levels of ability.

|                   |       |                               |          |                      |
|-------------------|-------|-------------------------------|----------|----------------------|
| 1                 | 2     | 3                             | 4        | 5                    |
| Strongly<br>Agree | Agree | Neither<br>agree nor disagree | Disagree | Strongly<br>Disagree |

5. Instructor facilitated group problem-solving during health education portion.

|                   |       |                               |          |                      |
|-------------------|-------|-------------------------------|----------|----------------------|
| 1                 | 2     | 3                             | 4        | 5                    |
| Strongly<br>Agree | Agree | Neither<br>agree nor disagree | Disagree | Strongly<br>Disagree |

6. Instructor answered participants' questions accurately.

|                   |       |                               |          |                      |
|-------------------|-------|-------------------------------|----------|----------------------|
| 1                 | 2     | 3                             | 4        | 5                    |
| Strongly<br>Agree | Agree | Neither<br>agree nor disagree | Disagree | Strongly<br>Disagree |

7. Rate Instructor's degree of control over class?

|           |      |      |      |
|-----------|------|------|------|
| 1         | 2    | 3    | 4    |
| Excellent | Good | Fair | Poor |

8. What did you like most about the instructor?

9. What suggestions do you have for the instructor to improve the class?



Please rate your overall reaction to the health education component:

\_\_\_\_ Excellent(1) \_\_\_\_\_ Good(2)    \_\_\_\_ Fair(3)    \_\_\_\_ Poor(4)

**Physical Space**

1. The space is large enough to accommodate class.

1                      2                      3                      4                      5  
Comfortably                      Barely                      Not at all

2. The temperature of the room was appropriate for exercise.

1                      2                      3                      4                      5  
Too hot                      Just right                      Too cold

3. Participants are able to see the instructor during class.

1                      2                      3                      4                      5  
Perfectly                      Somewhat                      Not at all

4. The music is at the appropriate volume and engaging.

1                      2                      3                      4                      5  
Too loud                      Just right                      Too soft

Disruptions occur?    Yes\_\_\_\_\_    No\_\_\_\_\_

Describe:

Program Modifications/Adaptations:

**Please rate your overall reaction to the class:**

\_\_\_ **Excellent(1)** \_\_\_ **Good(2)** \_\_\_ **Fair(3)** \_\_\_ **Poor(4)**

Additional comments:

Should Instructor be encouraged to take Master Trainer Training?

Yes \_\_\_                      No \_\_\_

Comments:
